# Supplementary material for: Could Inflammatory Indices and Metabolic Syndrome Predict the Risk of Cancer Development? Analysis from the Bagnacavallo Population Study
Source: PubMed Central journal article supplement (PMC7231063; doi:10.3390/jcm9041177), 2020-04-20
Supplement: jcm-09-01177-s001.pdf [file jcm-09-01177-s001.pdf]

**Table S1.** List of ICD10 codes and description of tumor site.

| <b>ICD10 code</b> | <b>Tumour site</b>                                           |
|-------------------|--------------------------------------------------------------|
| C00-14,30-32      | Malignant neoplasm of head and neck                          |
| C15               | Malignant neoplasm of esophagus                              |
| C16               | Malignant neoplasm of stomach                                |
| C17               | Malignant neoplasm of small intestine                        |
| C18-21            | Malignant neoplasm of colon-rectum                           |
| C22               | Malignant neoplasm of liver                                  |
| C25               | Malignant neoplasm of pancreas                               |
| C33-34            | Malignant neoplasm of trachea and lung                       |
| C40-41            | Malignant neoplasm of bone                                   |
| C43               | Malignant melanoma of skin                                   |
| C45               | Mesothelioma                                                 |
| C46               | Kaposi's Sarcoma                                             |
| C48.0-48.2        | Malignant neoplasm of retroperitoneum and peritoneum         |
| C50               | Malignant neoplasm of breast                                 |
| C53               | Malignant neoplasm of cervix uteri                           |
| C54               | Malignant neoplasm of corpus uteri                           |
| C55               | Malignant neoplasm of cervix nas                             |
| C56               | Malignant neoplasm of ovary                                  |
| C58               | Malignant neoplasm of placenta                               |
| C60               | Malignant neoplasm of penis                                  |
| C61               | Malignant neoplasm of prostate                               |
| C62               | Malignant neoplasm of testis                                 |
| C64-66,68         | Malignant neoplasm of kidney                                 |
| C67               | Malignant neoplasm of bladder                                |
| C69-72            | Malignant neoplasms of eye, brain and central nervous system |
| C73               | Malignant neoplasm of thyroid                                |
| C81               | Hodgkin's disease                                            |
| C82-85,96         | non-Hodgkin's lymphoma                                       |
| C88-90            | Multiple Mieloma                                             |
| C91-95            | Leukemia                                                     |
| C00-43,C45-96     | All malignant tumors excluding non-melanoma skin             |
